# Supplementary material for: Two-dimensional (2D) quasi-living crystallization-driven self-assembly of polyethylene-b-hyperbranched polyglycidol diblock copolymers in solution
Source: Royal Society of Chemistry journal article supplement (doi:10.1039/d4sm00845f), 2024-01-01
Supplement: d4sm00845f1.pdf [file d4sm00845f1.pdf]

## Two-Dimensional (2D) Quasi-Living Crystallization-Driven Self-Assembly of Polyethylene-*b*-Hyperbranched Polyglycidol Diblock Copolymers in Solution

Xiaowen Si, Chenxi Jiang, Yu Hu, Jingshan Mu\*

Department of Polymer Science and Engineering, Faculty of Materials Science and Chemical Engineering, Ningbo University, Ningbo 315211, P.R.China

### Supporting information

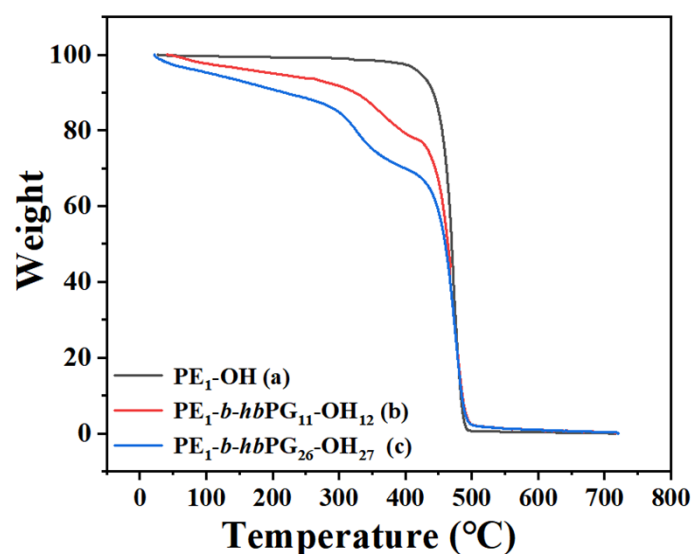

Figure S1 The TGA curves of E<sub>157</sub>G<sub>26</sub> and E<sub>157</sub>G<sub>11</sub>

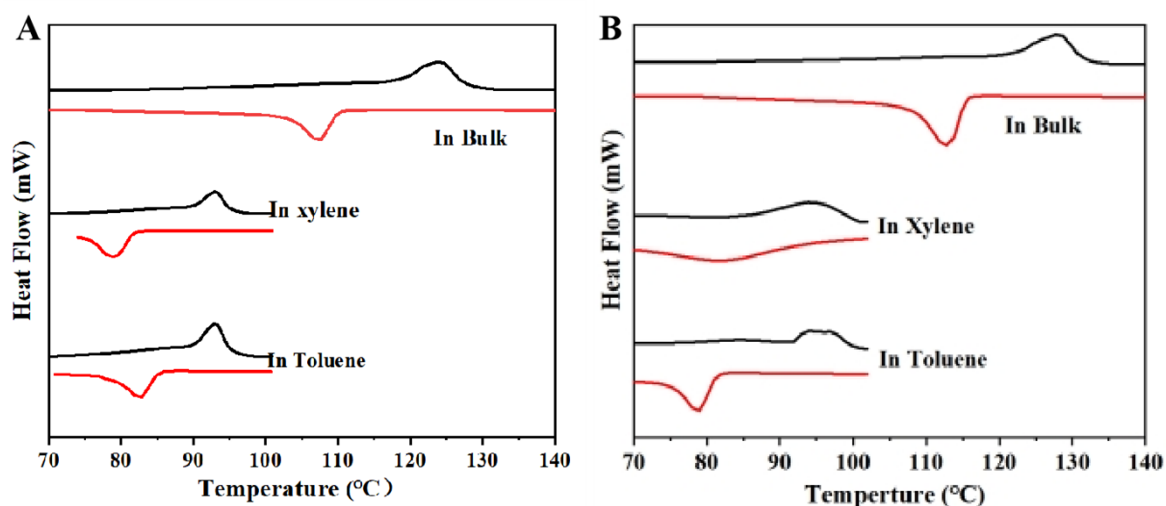

Figure S2 The DSC melting and crystallization curves of E<sub>157</sub>G<sub>26</sub> and E<sub>157</sub>G<sub>11</sub> in both bulk and solvents

\*Corresponding author. Tel: +86-18868928944, E-mail: mujingshan@nbu.edu.cn

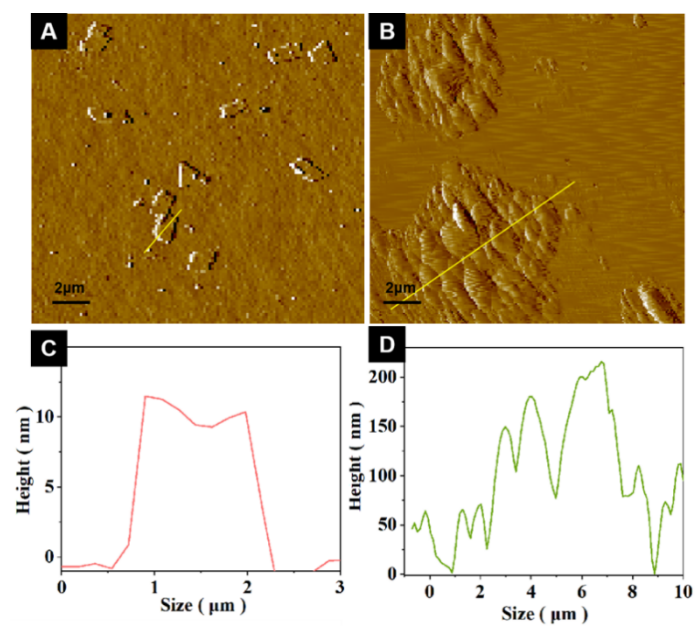

Figure S3 The AFM and height images of E<sub>157</sub>G<sub>26</sub> (A, C) and E<sub>157</sub>OH (B, D) in xylene at 75°C after 4 hours isothermal crystallization.
